# Supplementary material for: Multiplex amplification of target genes of periodontal pathogens in continuous flow PCR microfluidic chip
Source: Royal Society of Chemistry journal article supplement (doi:10.1039/d1lc00457c), 2021-01-01
Supplement: d1lc00457c1.pdf [file d1lc00457c1.pdf]

# **Multi-amplification of Target Genes for Periodontal Pathogens in Continuous Flow PCR Microfluidic Chip**

Zhenqing Li <sup>a</sup>, Jiahui Liu <sup>a</sup>, Ping Wang<sup>b</sup>, Chunxian Tao <sup>a</sup>, Lulu Zheng <sup>a</sup>, Shinichi Sekine <sup>c</sup>, Shonglin Zhuang <sup>a</sup>, Dawei Zhang <sup>a,\*</sup>, Yoshinori Yamaguchi <sup>d,\*</sup>

<sup>a</sup> Engineering Research Center of Optical Instrument and System, Ministry of Education, Shanghai Key Lab of Modern Optical System, University of Shanghai for Science and Technology, Shanghai, China

<sup>b</sup> Department of Clinical Laboratory, Xinhua Hospital, Shanghai Jiao Tong University School of Medicine, 1665 Kongjiang Road, Shanghai 200092, China

<sup>c</sup> Department of Preventive Dentistry, Graduate School of Dentistry, Osaka University, Osaka, Japan

<sup>d</sup> Oono Joint Research laboratory, Graduate school of Engineering, Osaka University, Osaka 565-0871, Japan

## **Corresponding authors**

Dawei Zhang, [dwzhang@usst.edu.cn](mailto:dwzhang@usst.edu.cn);

Yoshinori Yamaguchi, [yoshi.yamaguchi@ap.eng.osaka-u.ac.jp](mailto:yoshi.yamaguchi@ap.eng.osaka-u.ac.jp)

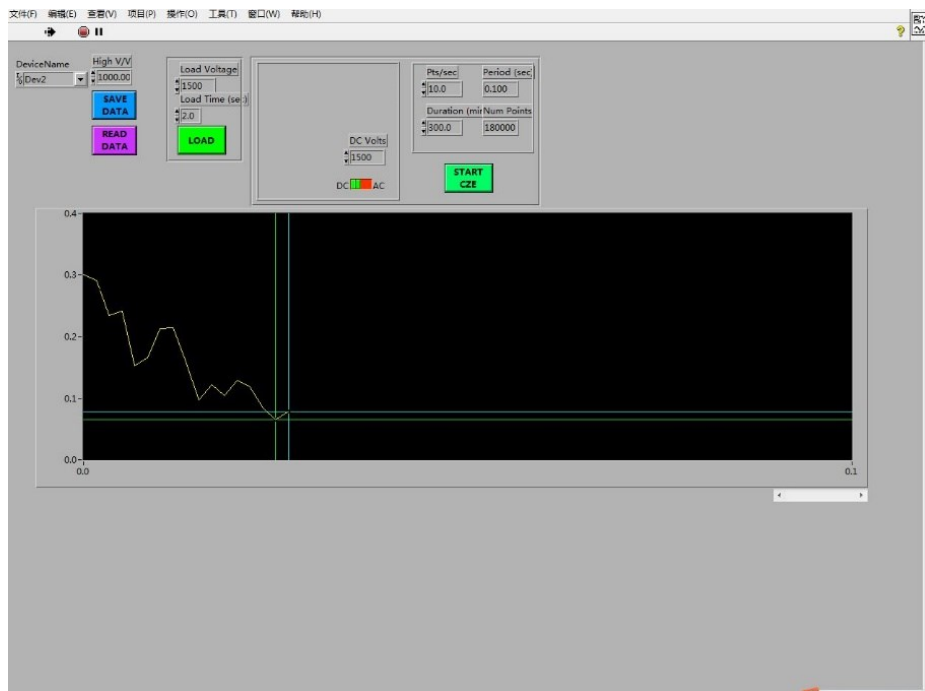

Fig.1S The user-interface of the program developed by LabVIEW.



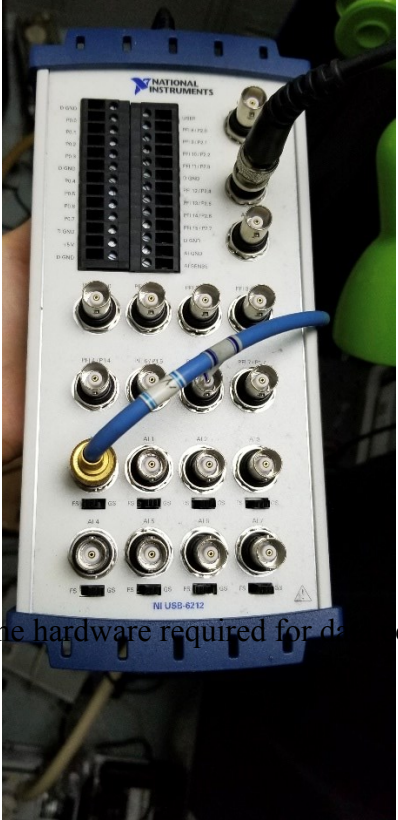

Fig.3S The hardware required for data collection.

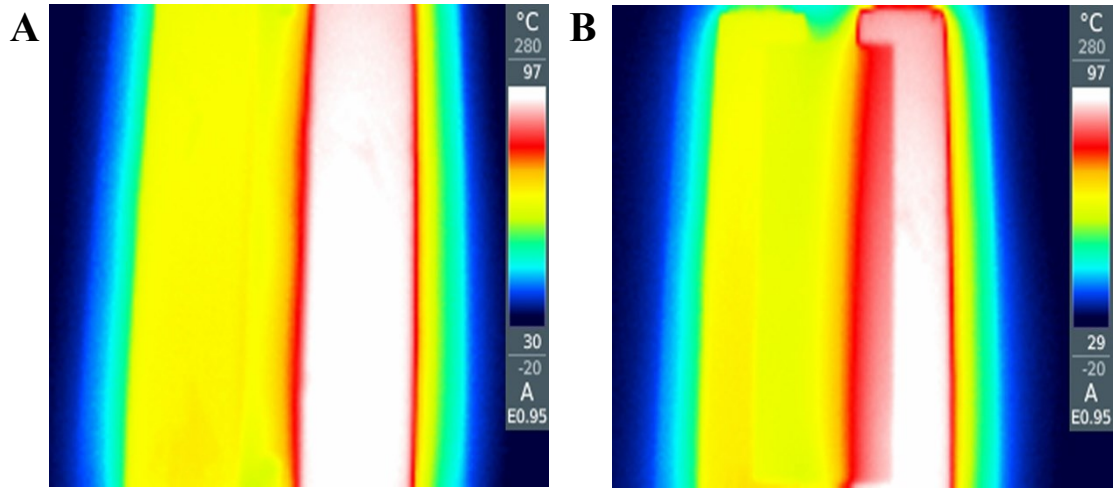

Fig.4S The temperature distribution of the heaters (A) without and (B) with slide.

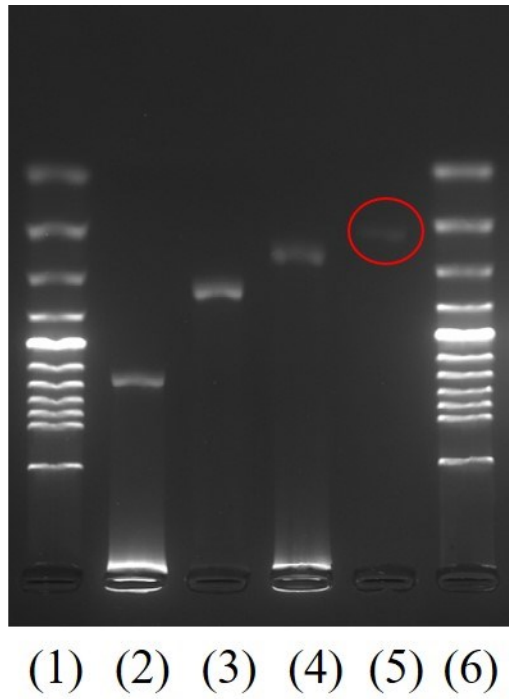

Fig.5S Slab gel electrophoresis of 100 bp DNA ladders (lane1 and lane 6) and PCR products of *T.f* (641 bp, lane 2), *T.d* (316 bp, lane 3), *T.f* (226 bp, lane 4) and *P.g* (197 bp, lane 5). Electrophoretic conditions: 2.0% agarose, 8 V/cm, 26 °C.

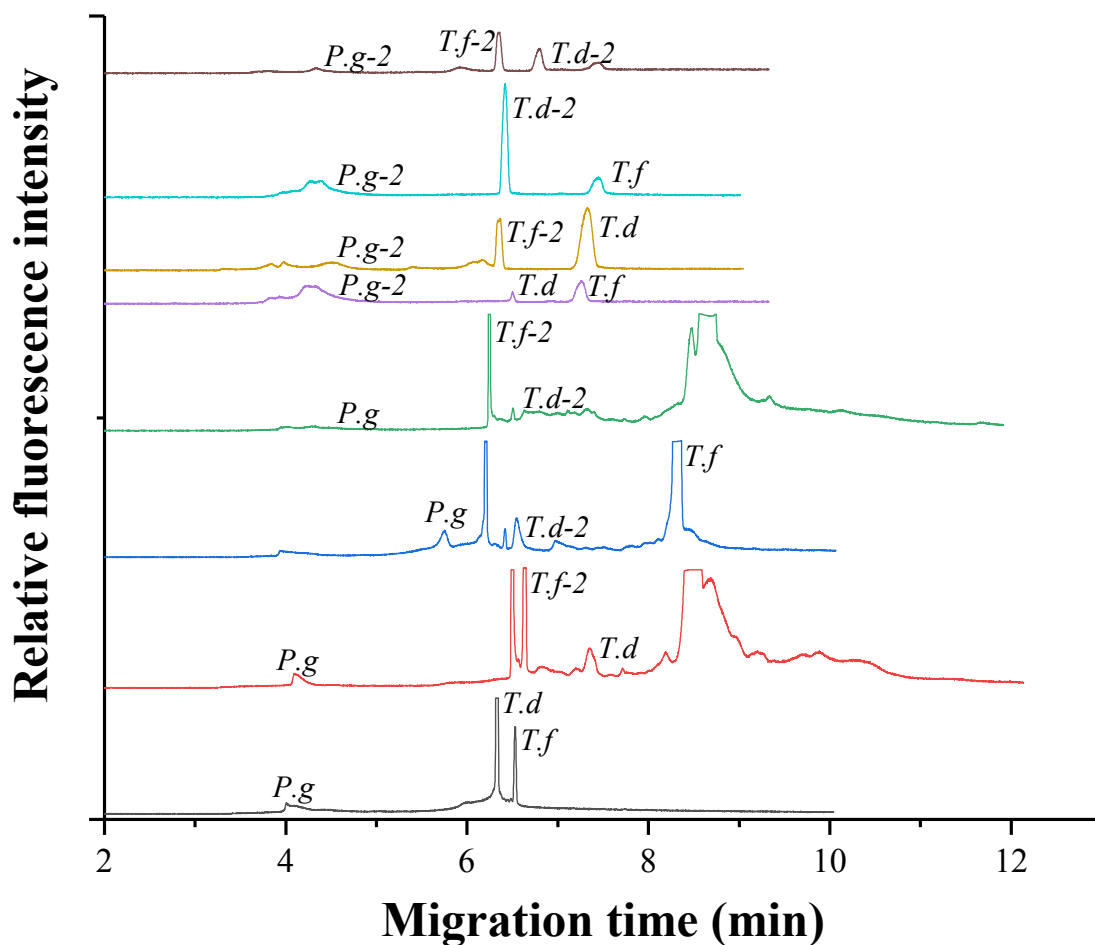

Fig.6S The electropherogram of multi-PCR products of *P.g*, *T.d* and *T.f* with other groups of primers. Capillary electrophoretic conditions: 0.5% HEC (1300k) in 0.5× TBE solution; electric field strength: 100 V/cm; sample injection (1500 V, 2.0 sec); total length and effective length of the capillary: 15.0 cm/8.0 cm.

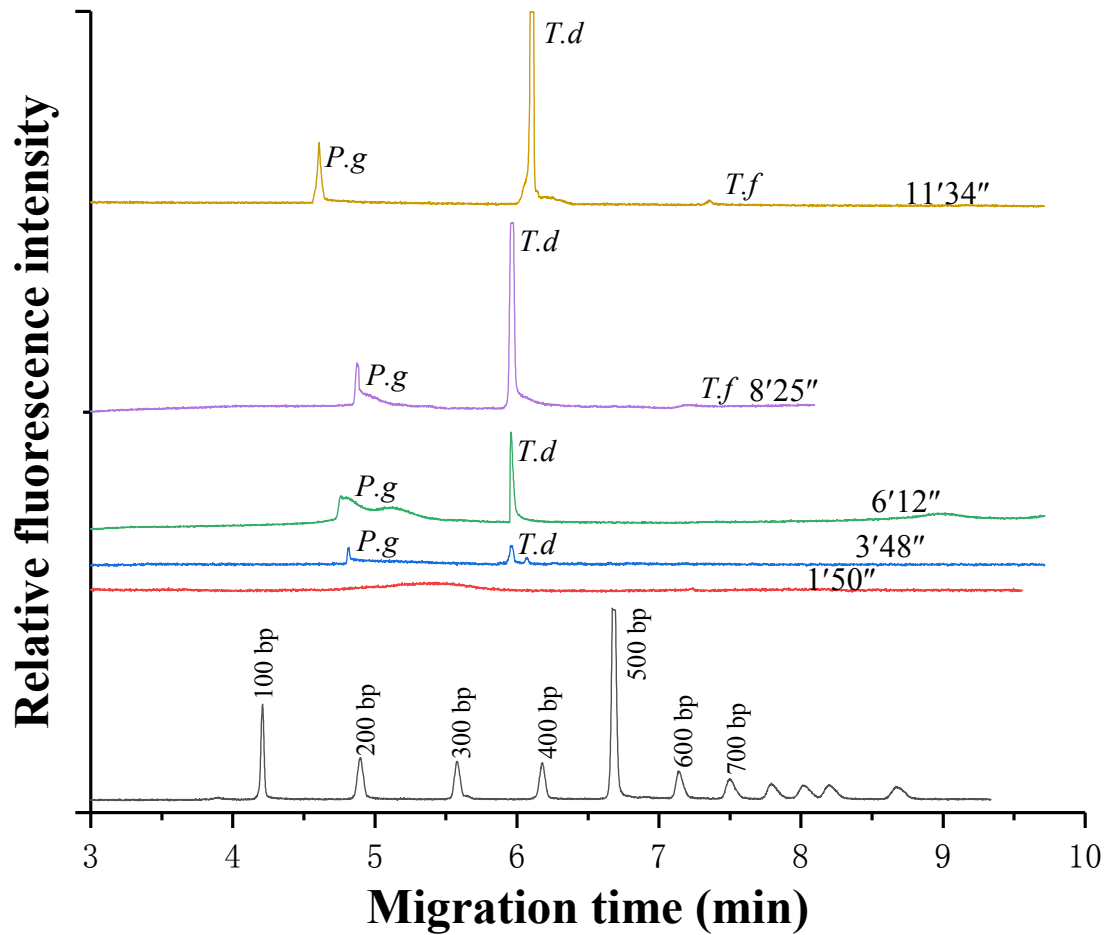

Fig.7S The electropherogram of multi-PCR of three kinds of bacteria (197 bp, 316 bp and 641 bp) with different CF-PCR time. Capillary electrophoretic conditions: 0.5% HEC (1300k) in 0.5× TBE solution; electric field strength: 100 V/cm; sample injection (1500 V, 2.0 sec); total length and effective length of the capillary: 15.0 cm/8.0 cm.



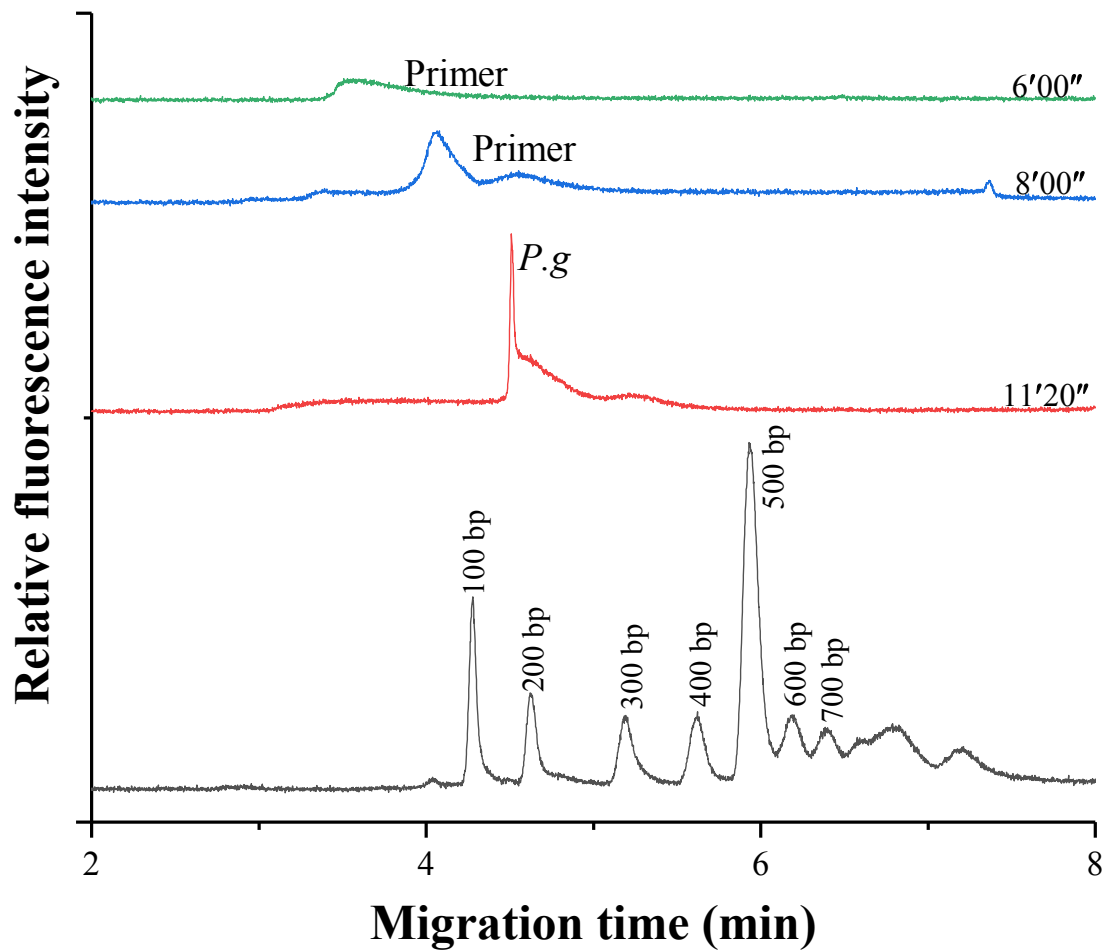

Fig.8S The electropherogram of multi-PCR of periodontal pathogens by conventional PCR thermal cycler with different time. Capillary electrophoretic conditions: 0.5% HEC (1300k) in 0.5× TBE solution; electric field strength: 100 V/cm; sample injection (1500 V, 2.0 sec); total length and effective length of the capillary: 15.0 cm/8.0 cm.

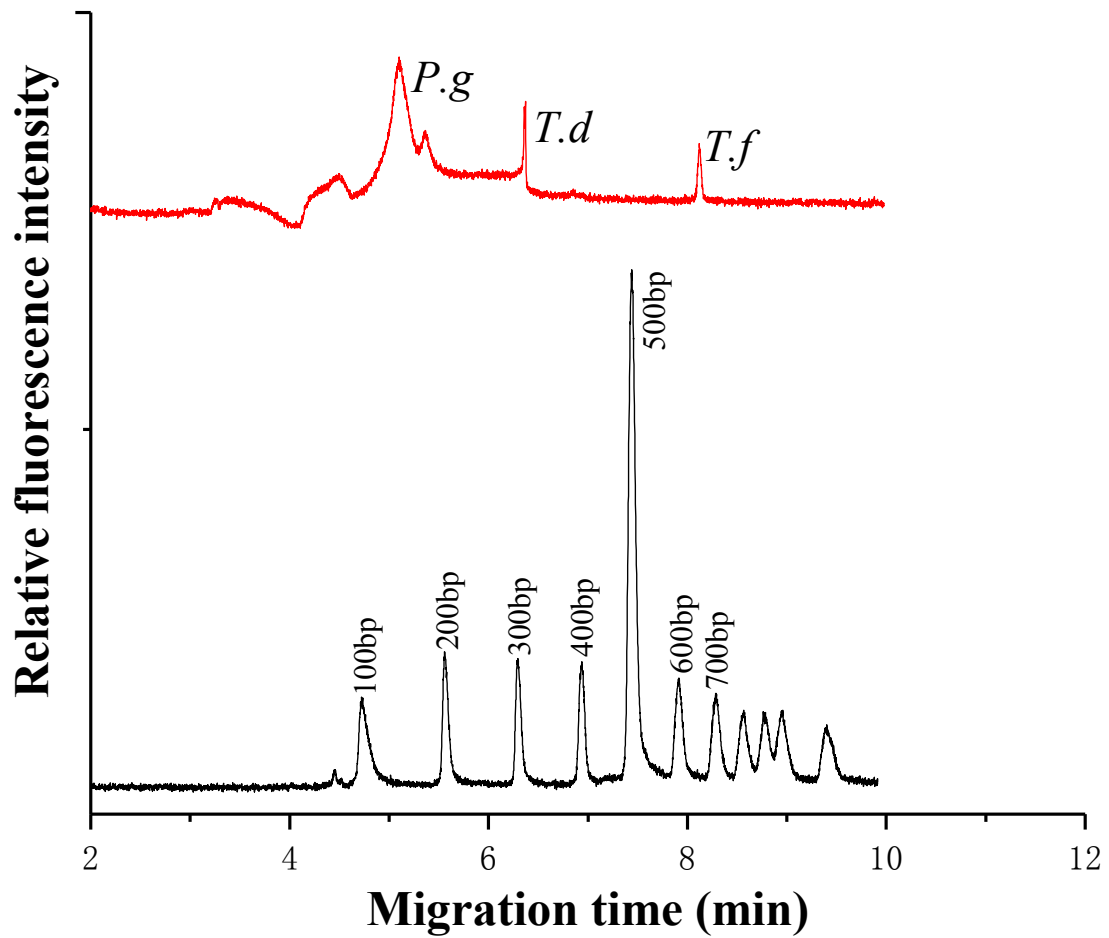

Fig.9S The electropherogram of multi-PCR of periodontal pathogens by conventional PCR thermal cyclers. Capillary electrophoretic conditions: 0.5% HEC (1300k) in 0.5× TBE solution; electric field strength: 100 V/cm; sample injection (1500 V, 2.0 sec); total length and effective length of the capillary: 15.0 cm/8.0 cm.
